# Supplementary material
Source: Copernicus journal article supplement (doi:10.5194/egusphere-2026-2112)
Supplement: Supplementary file 1 [file egusphere-2026-2112-supplement.pdf]

# Supplementary Information for: Chemical characterization and source apportionment of PM<sub>10</sub> in Belgrade, Serbia: influence of local and regional anthropogenic and natural sources

Bojana Petrović<sup>1</sup>, Andres Alastuey<sup>2</sup>, Karl E. Yttri<sup>3</sup>, Marco Pandolfi<sup>2</sup>, Maja Jovanović<sup>1</sup>, Bojan Radović<sup>4</sup>, Renata Kovačević<sup>4</sup>, Danka B. Stojanović<sup>1</sup>, Miloš Davidović<sup>1</sup>, Stephen M. Platt<sup>3</sup>, Alena Bartonova<sup>3</sup>, Milena Jovasević-Stojanović<sup>1</sup>

<sup>1</sup>VIDIS Centre, Vinča Institute of Nuclear Sciences, National Institute of the Republic of Serbia, University of Belgrade, Belgrade, Serbia

<sup>2</sup> Institute of Environmental Assessment and Water Research, (IDAEA CSIC), Barcelona, Spain

<sup>3</sup> NILU, Norway

<sup>4</sup>Mining and Metallurgy Institute Bor, Serbia

Correspondence to: Milena Jovasević-Stojanović ([webiopat@vin.bg.ac.rs](mailto:webiopat@vin.bg.ac.rs))

**Table S1. Overview of the source apportionment studies conducted in Belgrade for the period 2003-2015.**

| PM fraction                          | Sampling site                                                                    | Study period          | Number of samples                              | Chemical components analyzed          | Factors resolved                                                                                                                                                                                        | Model used                   | Reference          |
|--------------------------------------|----------------------------------------------------------------------------------|-----------------------|------------------------------------------------|---------------------------------------|---------------------------------------------------------------------------------------------------------------------------------------------------------------------------------------------------------|------------------------------|--------------------|
| PM <sub>2.5</sub> , PM <sub>10</sub> | 1. Roof of Rector's Office building of University of Belgrade (urban background) | June 2003 – July 2005 | PM <sub>2.5</sub> : 64; PM <sub>10</sub> : 209 | Pb, Cu, Zn, Mn, Fe, Cd, Ni, V, Al, Cr | PM <sub>2.5</sub> : resuspended road dust, traffic and oil refineries, oil combustion, diesel fuel and local industry<br>PM <sub>10</sub> : road dust, fuel oil, road traffic emission, traffic exhaust | Principal component analysis | Rajšić et al. 2008 |
|                                      | 2. Faculty of Veterinary Medicine (urban traffic)                                |                       |                                                |                                       |                                                                                                                                                                                                         |                              |                    |

|                        |                                                                                                                                                                                                                        |                           |                      |                                                                                                                                                                                        |                                                                                                                                                            |                              |                       |
|------------------------|------------------------------------------------------------------------------------------------------------------------------------------------------------------------------------------------------------------------|---------------------------|----------------------|----------------------------------------------------------------------------------------------------------------------------------------------------------------------------------------|------------------------------------------------------------------------------------------------------------------------------------------------------------|------------------------------|-----------------------|
| <b>PM<sub>10</sub></b> | 1. Roof of Rector's Office building of University of Belgrade (urban background)                                                                                                                                       | July 2003 – December 2006 | 277                  | Al, V, Cr, Mn, Fe, Ni, Cu, Zn, Cd, Pb                                                                                                                                                  | Fossil fuel combustion, traffic exhaust/regional transport from industril centers, traffic related particles/site specific sources, mineral/crustal matter | Unmix USEPA                  | Mijić et al. 2012     |
|                        | 2. Faculty of Vetrinary Medicine (urban traffic)                                                                                                                                                                       |                           |                      |                                                                                                                                                                                        |                                                                                                                                                            |                              |                       |
| <hr/>                  |                                                                                                                                                                                                                        |                           |                      |                                                                                                                                                                                        |                                                                                                                                                            |                              |                       |
| <b>PM<sub>10</sub></b> | <b>D<sub>p</sub> ≤ 0.49 μm</b><br><b>0.49 ≤ D<sub>p</sub> ≤ 0.95;</b><br><b>0.95 ≤ D<sub>p</sub> ≤ 1.5;</b><br><b>1.5 ≤ D<sub>p</sub> ≤ 3.0;</b><br><b>3.0 ≤ D<sub>p</sub> ≤ 7.2;</b><br><b>D<sub>p</sub> ≥ 7.2 μm</b> | Knjeginje Ljubice 21      | June – December 2008 | Na <sup>+</sup> , NH <sub>4</sub> <sup>+</sup> , K <sup>+</sup> , Mg <sup>2+</sup> , Ca <sup>2+</sup> , Cl <sup>-</sup> , NO <sub>3</sub> <sup>-</sup> , SO <sub>4</sub> <sup>2-</sup> | Ammonium sulphate; marine aerosol; construction activities; fertilizer plant; industrial zone; biomass burning                                             | Principal component analysis | Đorđević et al. 2012  |
|                        | <hr/>                                                                                                                                                                                                                  |                           |                      |                                                                                                                                                                                        |                                                                                                                                                            |                              |                       |
| <b>PM<sub>10</sub></b> | 1. Lazarevac (suburban industrial)                                                                                                                                                                                     |                           |                      | Naphthalene, Acenaphthylene, Acenaphthene, Fluorene, Phenanthrene, Anthracene, Fluoranthen, Pyrene,                                                                                    | Diesel and gasoline exhaust (traffic 1), unburned petroleum from vehicles (traffic 2), stationary sources, wood combustion, coal combustion,               | USEPA PMF 3.0                | Cvetković et al. 2015 |
|                        | 2. Grabovac (rural industrial)                                                                                                                                                                                         | 2010 – 2011               |                      | Benz[a]anthracene, Chrysene, Benzo[b]fluoranthene, Benzo[k]fluoranthene, Benzo[a]pyrene, Indeno(1.2.3-cd), pyrene,                                                                     |                                                                                                                                                            |                              |                       |
|                        | 3. Slavija (urban traffic)                                                                                                                                                                                             |                           |                      | Dibenz[ah]anthracene, Benzo[ghi]perylene                                                                                                                                               |                                                                                                                                                            |                              |                       |

|                         |                                     |                          |     |                                                                                                                                                                                                                                         |                                                                                                                                    |               |                       |
|-------------------------|-------------------------------------|--------------------------|-----|-----------------------------------------------------------------------------------------------------------------------------------------------------------------------------------------------------------------------------------------|------------------------------------------------------------------------------------------------------------------------------------|---------------|-----------------------|
| <b>PM<sub>10</sub></b>  | Institute of Public Health Belgrade | 2011 – 2015              | 254 | Benzo[a]pyrene, As, Cd, Cr, Mn, Ni, Pb, Cl <sup>-</sup> , Na <sup>+</sup> , Mg <sup>2+</sup> , Ca <sup>2+</sup> , K <sup>+</sup> , NO <sub>3</sub> <sup>-</sup> , SO <sub>4</sub> <sup>2-</sup> , NH <sub>4</sub> <sup>+</sup> , OC, EC | Solid fuel burning, industrial emissions, secondary aerosols, vehicle derived and particle resuspension                            | Unmix USEPA   | Stojic et al. 2016    |
| <b>PM<sub>2.5</sub></b> | Zeleno brdo (suburban background)   | May 2014 – May 2015      |     | Al, S, P, S, Cl, K, Ca, Ti, V, Cr, Mn, Fe, Ni, Cu, Zn, Br, As, Ba, Pb, NH <sub>4</sub> <sup>+</sup> , NO <sub>3</sub> <sup>-</sup> , SO <sub>4</sub> <sup>2-</sup>                                                                      | Biomass burning, traffic, secondary sulphate from regional combustion sources, local combustion sources and ammonium nitrate, soil | USEPA PMF 5.0 | Todorovic et al. 2020 |
| <b>PM<sub>2.5</sub></b> | Zeleno brdo (suburban background)   | April 2014 – August 2015 | 166 | Al, Si, S, Cl, K, Ca, Ti, V, Mn, Fe, Cu, Zn, Pb, Ni                                                                                                                                                                                     | Soil, biomass burning, traffic, fuel oil combustion, secondary sulfate                                                             | USEPA PMF 5.0 | Almeida et al. 2020   |

### PMF modelling

To determine the optimal number of factors, we started by varying the number of factors in PMF from 3 to 9 with random seeds and no applied factor constrains. We selected the final solution with 7 factors based on next criteria: (1) all factors' chemical profile and temporal variability could have been interpreted, (2)  $Q_{true}/Q_{exp}$  (1.03) ratio lower than 1.5 which indicates a negligible influence of the outliers on the results (Glojek et al. 2024), (3) normal distribution of modelled species with uncertainty-scaled residuals within  $\pm 3$ , and (4) on displacement (DISP) and bootstrap (BS) analysis which confirmed the stability of the model. In case of DISP test, no factor swaps were reported while BS analysis based on 100 runs showed > 70 out of 100 mapped factors (Table 1) which is considered as appropriate solution (Glojek et al. 2024). The extra model uncertainty was 7%. The correlation between observed and modelled PM<sub>10</sub> concentrations was 0.92.

**Table S2. Bootstrap values of the base run.**

| Factors         | BS mapped factors |
|-----------------|-------------------|
| Biomass burning | 100               |

|                  |     |
|------------------|-----|
| NaCl/COMB        | 92  |
| Mineral dust     | 100 |
| PBAP             | 100 |
| BSOAisoprene     | 100 |
| Ammonium sulfate | 88  |
| TRA/IND          | 92  |

NaCl/COMB – long-range transport and road-salt/local combustion; PBAP – primary biological aerosol particles; BSOAisoprene – biological secondary organic aerosol from isoprene; TRA/IND – traffic/industry factor.

**Table S3. Seasonal levels of analysed species (ng m<sup>-3</sup>) in Belgrade during WeBaSOOP campaign (N=84).**

| Species                       | N  | Average ( $\pm$ SD)  | Spring | Summer | Autumn | Winter | NH    | H     |
|-------------------------------|----|----------------------|--------|--------|--------|--------|-------|-------|
| PM <sub>10</sub> *            | 84 | 23943 ( $\pm$ 14867) | 20107  | 20289  | 23283  | 32537  | 19272 | 28189 |
| OC                            | 84 | 8185 ( $\pm$ 6489)   | 5288   | 6412   | 8441   | 12996  | 5936  | 10230 |
| EC                            | 84 | 1384 ( $\pm$ 1030)   | 927    | 933    | 1636   | 2140   | 955   | 1774  |
| OM                            | 84 | 11459 ( $\pm$ 9085)  | 7403   | 8977   | 11818  | 18194  | 8310  | 14322 |
| Cl <sup>-</sup>               | 84 | 135 ( $\pm$ 185)     | 70     | 25     | 178    | 285    | 26    | 234   |
| NO <sub>3</sub> <sup>-</sup>  | 84 | 1294 ( $\pm$ 1498)   | 615    | 364    | 1647   | 2709   | 478   | 2035  |
| SO <sub>4</sub> <sup>2-</sup> | 84 | 2531 ( $\pm$ 1874)   | 2140   | 3201   | 2213   | 2532   | 2967  | 2135  |
| NH <sub>4</sub> <sup>+</sup>  | 84 | 673 ( $\pm$ 541)     | 444    | 776    | 672    | 815    | 716   | 634   |
| Na                            | 83 | 158 ( $\pm$ 132)     | 156    | 74     | 196    | 211    | 82    | 225   |
| Mg                            | 84 | 109 ( $\pm$ 105)     | 128    | 82     | 107    | 117    | 79    | 135   |
| Al                            | 83 | 409 ( $\pm$ 426)     | 572    | 347    | 282    | 412    | 338   | 471   |
| K                             | 84 | 353 ( $\pm$ 385)     | 219    | 142    | 411    | 672    | 157   | 531   |
| Ca                            | 84 | 492 ( $\pm$ 413)     | 611    | 432    | 395    | 507    | 416   | 561   |
| V                             | 84 | 1.67 ( $\pm$ 1.48)   | 1.35   | 0.91   | 1.67   | 2.83   | 0.91  | 2.37  |
| Cr                            | 66 | 2.59 ( $\pm$ 2.41)   | 4.62   | 1.24   | 0.84   | 3.21   | 1.67  | 3.42  |
| Mn                            | 81 | 7.29 ( $\pm$ 5.20)   | 7.82   | 6.09   | 6.59   | 8.66   | 5.87  | 8.49  |

|                    |    |                      |       |       |       |        |       |       |
|--------------------|----|----------------------|-------|-------|-------|--------|-------|-------|
| Fe                 | 80 | 497 ( $\pm$ 375)     | 512   | 412   | 463   | 603    | 391   | 584   |
| Co                 | 80 | 0.12 ( $\pm$ 0.12)   | 0.14  | 0.10  | 0.12  | 0.13   | 0.08  | 0.15  |
| Ni                 | 84 | 2.07 ( $\pm$ 1.24)   | 2.49  | 1.43  | 1.94  | 2.42   | 1.67  | 2.44  |
| Cu                 | 64 | 6.00 ( $\pm$ 7.06)   | 2.67  | 2.66  | 9.38  | 8.49   | 2.40  | 8.46  |
| Zn                 | 54 | 19.17 ( $\pm$ 20.80) | 3.52  | 6.93  | 26.38 | 24.48  | 9.22  | 23.00 |
| Ga                 | 71 | 0.10 ( $\pm$ 0.10)   | 0.17  | 0.07  | 0.07  | 0.09   | 0.08  | 0.11  |
| As                 | 80 | 1.01 ( $\pm$ 0.90)   | 0.59  | 0.57  | 1.28  | 1.63   | 0.62  | 1.34  |
| Se                 | 82 | 0.33 ( $\pm$ 0.17)   | 0.32  | 0.36  | 0.32  | 0.34   | 0.33  | 0.33  |
| Rb                 | 84 | 0.86 ( $\pm$ 0.88)   | 0.68  | 0.49  | 0.87  | 1.44   | 0.45  | 1.24  |
| Sr                 | 84 | 1.97 ( $\pm$ 2.13)   | 2.67  | 1.46  | 1.71  | 1.98   | 1.61  | 2.31  |
| Cd                 | 84 | 0.16 ( $\pm$ 0.15)   | 0.09  | 0.08  | 0.17  | 0.29   | 0.08  | 0.22  |
| Ba                 | 83 | 11.24 ( $\pm$ 8.38)  | 5.78  | 8.05  | 15.84 | 16.35  | 7.41  | 14.80 |
| Pb                 | 81 | 3.27 ( $\pm$ 2.90)   | 2.60  | 2.39  | 3.50  | 4.64   | 2.36  | 4.04  |
| P                  | 84 | 19.31 ( $\pm$ 12.32) | 25.73 | 21.62 | 11.22 | 16.80  | 21.20 | 17.59 |
| Ti                 | 81 | 20.09 ( $\pm$ 27.58) | 35.83 | 16.30 | 12.33 | 16.81  | 17.08 | 24.63 |
| Zr                 | 58 | 1.98 ( $\pm$ 1.60)   | 2.76  | 1.98  | 1.54  | 1.65   | 2.07  | 1.92  |
| Mo                 | 66 | 12.46 ( $\pm$ 12.25) | 11.56 | 26.50 | 7.01  | 7.79   | 20.66 | 6.04  |
| Sb                 | 83 | 1.11 ( $\pm$ 0.92)   | 1.14  | 0.82  | 0.96  | 1.50   | 0.76  | 1.41  |
| Sn                 | 74 | 6.41 ( $\pm$ 6.79)   | 3.15  | 2.73  | 11.65 | 7.76   | 3.32  | 8.52  |
| Galactosan         | 84 | 12.51 ( $\pm$ 22.34) | 1.76  | 0.57  | 16.21 | 33.60  | 0.90  | 23.05 |
| Mannosan           | 84 | 55.3 ( $\pm$ 103.3)  | 7.9   | 2.1   | 65.6  | 154.0  | 3.6   | 102.2 |
| Levoglucosan       | 84 | 413.0 ( $\pm$ 682.3) | 74.8  | 34.3  | 545.7 | 1066.4 | 48.4  | 744.4 |
| 2-methylerythritol | 84 | 5.01 ( $\pm$ 7.97)   | 3.51  | 14.44 | 1.01  | 0.21   | 10.15 | 0.35  |
| 2-methylthreitol   | 84 | 2.05 ( $\pm$ 2.78)   | 1.43  | 5.51  | 0.78  | 0.21   | 3.97  | 0.31  |
| Glucose            | 84 | 39.69 ( $\pm$ 25.93) | 46.60 | 60.27 | 31.97 | 17.16  | 58.46 | 22.62 |
| Fructose           | 84 | 10.16 ( $\pm$ 8.46)  | 15.37 | 15.09 | 6.41  | 2.51   | 16.32 | 4.57  |
| Mannitol           | 84 | 39.50 ( $\pm$ 32.85) | 45.73 | 74.03 | 24.81 | 9.12   | 66.68 | 14.80 |
| Arabitol           | 84 | 34.84 ( $\pm$ 26.85) | 43.67 | 57.73 | 25.02 | 9.63   | 56.75 | 14.93 |
| Trehalose          | 84 | 16.17 ( $\pm$ 11.51) | 20.41 | 25.17 | 11.07 | 6.48   | 24.51 | 8.59  |
| Inositol           | 77 | 3.15 ( $\pm$ 2.16)   | 3.55  | 3.83  | 2.92  | 1.71   | 3.96  | 2.26  |

Erythritol                      84                      4.36 ( $\pm$  5.17)                      4.08                      8.19                      2.77                      2.00                      6.95                      2.00

NH – non-heating season (April 15<sup>th</sup> – October 15<sup>th</sup>), H – heating season (October 15<sup>th</sup> – April 15<sup>th</sup>), N- number of samples, N – number of samples used for the source apportionment.

\*A complete gravimetric PM<sub>10</sub> time series, aligned with co-measured species (EC, OC, ions, and trace elements), was unavailable. Missing PM<sub>10</sub> values were gap-filled using data from the GRIMM instrument when it agreed to within  $\pm$ 20% of aerosol mass closure derived from the other measured variables; when GRIMM PM<sub>10</sub> was outside this range, the mass-closure value was used instead. Mass closure (MC) was calculated as MC = Ions + Mineral Dust + OM + EC + Trace Elements, where OM = OC  $\times$  1.4 and mineral dust was reconstructed as Dust = Ca  $\times$  1.5 + Al/0.53 + Al  $\times$  0.53  $\times$  2.5 + Na + Mg + K + Fe. This resulted in final PM<sub>10</sub> assignments for 40 samples from GRIMM, 25 from mass closure, and 19 from offline gravimetry.

**Table S4. Relative contribution of the measured species in each factor and contribution of identified factors to PM<sub>10</sub> (showed in %).**

|                               | BB | NaCl/COMB | MD | PBAP | BSOA <sub>Isoprene</sub> | SUL | TRA/IND |
|-------------------------------|----|-----------|----|------|--------------------------|-----|---------|
| PM <sub>10</sub>              | 21 | 9         | 17 | 10   | 10                       | 18  | 15      |
| OC                            | 33 | 9         | 5  | 14   | 11                       | 12  | 17      |
| EC                            | 22 | 13        | 0  | 11   | 4                        | 8   | 41      |
| Cl <sup>-</sup>               | 51 | 30        | 5  | 6    | 0                        | 7   | 0       |
| NO <sub>3</sub> <sup>-</sup>  | 16 | 51        | 0  | 4    | 0                        | 17  | 12      |
| SO <sub>4</sub> <sup>2-</sup> | 12 | 0         | 6  | 1    | 24                       | 54  | 2       |
| NH <sub>4</sub> <sup>+</sup>  | 13 | 9         | 0  | 0    | 22                       | 55  | 0       |
| Na                            | 0  | 61        | 28 | 0    | 0                        | 11  | 0       |
| Mg                            | 0  | 11        | 60 | 0    | 0                        | 7   | 22      |
| Al                            | 11 | 0         | 78 | 4    | 8                        | 0   | 0       |
| K                             | 51 | 5         | 22 | 6    | 1                        | 8   | 6       |
| Ca                            | 0  | 3         | 51 | 2    | 4                        | 7   | 34      |
| V                             | 23 | 0         | 30 | 1    | 1                        | 9   | 35      |
| Mn                            | 2  | 12        | 29 | 0    | 6                        | 0   | 51      |
| Fe                            | 2  | 8         | 19 | 0    | 6                        | 0   | 64      |
| Cu                            | 43 | 0         | 0  | 0    | 0                        | 0   | 57      |
| As                            | 28 | 13        | 7  | 4    | 6                        | 18  | 25      |
| Rb                            | 38 | 4         | 30 | 4    | 6                        | 2   | 16      |
| Sr                            | 6  | 4         | 62 | 5    | 0                        | 3   | 20      |

|                    |    |    |    |    |    |    |    |
|--------------------|----|----|----|----|----|----|----|
| Cd                 | 32 | 11 | 2  | 6  | 2  | 14 | 32 |
| Pb                 | 21 | 15 | 4  | 6  | 9  | 6  | 37 |
| Ti                 | 4  | 4  | 69 | 11 | 2  | 2  | 6  |
| Sb                 | 5  | 12 | 6  | 1  | 6  | 10 | 60 |
| Sn                 | 22 | 22 | 0  | 0  | 0  | 0  | 57 |
| Galactosan         | 80 | 9  | 1  | 4  | 1  | 2  | 3  |
| Mannosan           | 79 | 11 | 0  | 3  | 1  | 2  | 4  |
| Levoglucozan       | 76 | 11 | 0  | 3  | 1  | 3  | 6  |
| 2-methylerythritol | 0  | 0  | 2  | 7  | 84 | 7  | 0  |
| 2-methylthreitol   | 1  | 0  | 2  | 13 | 76 | 8  | 0  |
| Glucose            | 4  | 2  | 4  | 72 | 17 | 0  | 1  |
| Fructose           | 0  | 1  | 5  | 57 | 26 | 7  | 4  |
| Mannitol           | 2  | 0  | 4  | 62 | 28 | 3  | 0  |
| Arabitol           | 2  | 0  | 5  | 68 | 21 | 4  | 0  |
| Trehalose          | 2  | 2  | 7  | 63 | 20 | 1  | 5  |

---

BB – biomass burning, NaCl/COMB – mixed regional and road salt/local combustion; MD - mineral dust; PBAP – primary biological aerosol particles; BSOAisoprene – biological secondary organic aerosol from isoprene; SUL – ammonium sulphate; TRA/IND – traffic/industry.

**Table S5. Correlation coefficients between the species included in the PMF.**

|                               | PM <sub>10</sub> | OC    | EC    | Cl <sup>-</sup> | NO <sub>3</sub> <sup>-</sup> | SO <sub>4</sub> <sup>2-</sup> | NH <sub>4</sub> <sup>+</sup> | Na    | Mg    | Al    | K     | Ca    | V     | Mn    | Fe    | Cu    | As    | Rb    | Sr    | Cd    | Pb    | Ti    | Sb    | Sn    | Gala  | Manno | Levo  | 2-ME | 2-MT | Glu  | Fru  | Manni | Ara  | Tre  |  |  |  |
|-------------------------------|------------------|-------|-------|-----------------|------------------------------|-------------------------------|------------------------------|-------|-------|-------|-------|-------|-------|-------|-------|-------|-------|-------|-------|-------|-------|-------|-------|-------|-------|-------|-------|------|------|------|------|-------|------|------|--|--|--|
| PM <sub>10</sub>              | 1.00             |       |       |                 |                              |                               |                              |       |       |       |       |       |       |       |       |       |       |       |       |       |       |       |       |       |       |       |       |      |      |      |      |       |      |      |  |  |  |
| OC                            | 0.91             | 1.00  |       |                 |                              |                               |                              |       |       |       |       |       |       |       |       |       |       |       |       |       |       |       |       |       |       |       |       |      |      |      |      |       |      |      |  |  |  |
| EC                            | 0.79             | 0.88  | 1.00  |                 |                              |                               |                              |       |       |       |       |       |       |       |       |       |       |       |       |       |       |       |       |       |       |       |       |      |      |      |      |       |      |      |  |  |  |
| Cl <sup>-</sup>               | 0.61             | 0.63  | 0.58  | 1.00            |                              |                               |                              |       |       |       |       |       |       |       |       |       |       |       |       |       |       |       |       |       |       |       |       |      |      |      |      |       |      |      |  |  |  |
| NO <sub>3</sub> <sup>-</sup>  | 0.75             | 0.77  | 0.72  | 0.76            | 1.00                         |                               |                              |       |       |       |       |       |       |       |       |       |       |       |       |       |       |       |       |       |       |       |       |      |      |      |      |       |      |      |  |  |  |
| SO <sub>4</sub> <sup>2-</sup> | 0.56             | 0.48  | 0.30  | 0.11            | 0.27                         | 1.00                          |                              |       |       |       |       |       |       |       |       |       |       |       |       |       |       |       |       |       |       |       |       |      |      |      |      |       |      |      |  |  |  |
| NH <sub>4</sub> <sup>+</sup>  | 0.57             | 0.53  | 0.34  | 0.25            | 0.48                         | 0.91                          | 1.00                         |       |       |       |       |       |       |       |       |       |       |       |       |       |       |       |       |       |       |       |       |      |      |      |      |       |      |      |  |  |  |
| Na                            | 0.50             | 0.42  | 0.46  | 0.75            | 0.51                         | -0.03                         | 0.04                         | 1.00  |       |       |       |       |       |       |       |       |       |       |       |       |       |       |       |       |       |       |       |      |      |      |      |       |      |      |  |  |  |
| Mg                            | 0.46             | 0.19  | 0.19  | 0.28            | 0.15                         | 0.11                          | 0.00                         | 0.58  | 1.00  |       |       |       |       |       |       |       |       |       |       |       |       |       |       |       |       |       |       |      |      |      |      |       |      |      |  |  |  |
| Al                            | 0.36             | 0.09  | 0.04  | 0.19            | 0.13                         | 0.10                          | 0.07                         | 0.45  | 0.81  | 1.00  |       |       |       |       |       |       |       |       |       |       |       |       |       |       |       |       |       |      |      |      |      |       |      |      |  |  |  |
| K                             | 0.87             | 0.93  | 0.85  | 0.69            | 0.76                         | 0.32                          | 0.38                         | 0.53  | 0.34  | 0.19  | 1.00  |       |       |       |       |       |       |       |       |       |       |       |       |       |       |       |       |      |      |      |      |       |      |      |  |  |  |
| Ca                            | 0.54             | 0.26  | 0.26  | 0.21            | 0.17                         | 0.20                          | 0.04                         | 0.48  | 0.94  | 0.77  | 0.36  | 1.00  |       |       |       |       |       |       |       |       |       |       |       |       |       |       |       |      |      |      |      |       |      |      |  |  |  |
| V                             | 0.76             | 0.70  | 0.73  | 0.48            | 0.59                         | 0.27                          | 0.27                         | 0.49  | 0.56  | 0.40  | 0.81  | 0.61  | 1.00  |       |       |       |       |       |       |       |       |       |       |       |       |       |       |      |      |      |      |       |      |      |  |  |  |
| Mn                            | 0.73             | 0.55  | 0.60  | 0.35            | 0.39                         | 0.31                          | 0.20                         | 0.56  | 0.82  | 0.65  | 0.62  | 0.88  | 0.78  | 1.00  |       |       |       |       |       |       |       |       |       |       |       |       |       |      |      |      |      |       |      |      |  |  |  |
| Fe                            | 0.74             | 0.58  | 0.65  | 0.36            | 0.40                         | 0.30                          | 0.19                         | 0.53  | 0.76  | 0.55  | 0.64  | 0.81  | 0.81  | 0.97  | 1.00  |       |       |       |       |       |       |       |       |       |       |       |       |      |      |      |      |       |      |      |  |  |  |
| Cu                            | 0.57             | 0.66  | 0.67  | 0.47            | 0.55                         | 0.15                          | 0.20                         | 0.36  | 0.09  | 0.00  | 0.67  | 0.14  | 0.47  | 0.38  | 0.42  | 1.00  |       |       |       |       |       |       |       |       |       |       |       |      |      |      |      |       |      |      |  |  |  |
| As                            | 0.67             | 0.75  | 0.76  | 0.53            | 0.68                         | 0.35                          | 0.45                         | 0.38  | 0.26  | 0.16  | 0.74  | 0.27  | 0.66  | 0.52  | 0.53  | 0.52  | 1.00  |       |       |       |       |       |       |       |       |       |       |      |      |      |      |       |      |      |  |  |  |
| Rb                            | 0.90             | 0.86  | 0.78  | 0.65            | 0.68                         | 0.33                          | 0.33                         | 0.61  | 0.59  | 0.43  | 0.94  | 0.62  | 0.86  | 0.81  | 0.81  | 0.59  | 0.70  | 1.00  |       |       |       |       |       |       |       |       |       |      |      |      |      |       |      |      |  |  |  |
| Sr                            | 0.42             | 0.19  | 0.16  | 0.23            | 0.08                         | 0.11                          | -0.01                        | 0.45  | 0.90  | 0.75  | 0.35  | 0.84  | 0.55  | 0.71  | 0.68  | 0.06  | 0.26  | 0.56  | 1.00  |       |       |       |       |       |       |       |       |      |      |      |      |       |      |      |  |  |  |
| Cd                            | 0.77             | 0.83  | 0.78  | 0.58            | 0.80                         | 0.34                          | 0.47                         | 0.40  | 0.21  | 0.14  | 0.81  | 0.24  | 0.69  | 0.53  | 0.55  | 0.58  | 0.75  | 0.76  | 0.15  | 1.00  |       |       |       |       |       |       |       |      |      |      |      |       |      |      |  |  |  |
| Pb                            | 0.65             | 0.72  | 0.72  | 0.51            | 0.53                         | 0.35                          | 0.34                         | 0.42  | 0.20  | 0.09  | 0.69  | 0.28  | 0.59  | 0.53  | 0.57  | 0.58  | 0.65  | 0.69  | 0.20  | 0.69  | 1.00  |       |       |       |       |       |       |      |      |      |      |       |      |      |  |  |  |
| Ti                            | 0.28             | 0.02  | 0.01  | 0.07            | -0.05                        | 0.00                          | -0.13                        | 0.44  | 0.86  | 0.82  | 0.17  | 0.82  | 0.43  | 0.66  | 0.59  | -0.04 | 0.06  | 0.43  | 0.83  | 0.05  | 0.04  | 1.00  |       |       |       |       |       |      |      |      |      |       |      |      |  |  |  |
| Sb                            | 0.70             | 0.66  | 0.74  | 0.46            | 0.51                         | 0.30                          | 0.27                         | 0.52  | 0.40  | 0.34  | 0.64  | 0.52  | 0.68  | 0.71  | 0.71  | 0.50  | 0.60  | 0.72  | 0.34  | 0.62  | 0.68  | 0.30  | 1.00  |       |       |       |       |      |      |      |      |       |      |      |  |  |  |
| Sn                            | 0.42             | 0.49  | 0.66  | 0.40            | 0.46                         | 0.04                          | 0.11                         | 0.42  | 0.17  | 0.01  | 0.52  | 0.16  | 0.49  | 0.43  | 0.47  | 0.61  | 0.48  | 0.47  | 0.07  | 0.51  | 0.47  | -0.01 | 0.49  | 1.00  |       |       |       |      |      |      |      |       |      |      |  |  |  |
| Gala                          | 0.82             | 0.94  | 0.85  | 0.72            | 0.82                         | 0.28                          | 0.39                         | 0.46  | 0.13  | 0.02  | 0.95  | 0.15  | 0.69  | 0.45  | 0.49  | 0.69  | 0.73  | 0.84  | 0.14  | 0.83  | 0.66  | -0.04 | 0.58  | 0.51  | 1.00  |       |       |      |      |      |      |       |      |      |  |  |  |
| Manno                         | 0.81             | 0.93  | 0.85  | 0.77            | 0.83                         | 0.28                          | 0.38                         | 0.50  | 0.15  | 0.04  | 0.94  | 0.18  | 0.68  | 0.47  | 0.50  | 0.67  | 0.71  | 0.84  | 0.14  | 0.82  | 0.68  | -0.03 | 0.62  | 0.52  | 0.98  | 1.00  |       |      |      |      |      |       |      |      |  |  |  |
| Levo                          | 0.80             | 0.94  | 0.87  | 0.73            | 0.79                         | 0.27                          | 0.37                         | 0.47  | 0.13  | 0.03  | 0.95  | 0.15  | 0.69  | 0.47  | 0.50  | 0.71  | 0.73  | 0.84  | 0.13  | 0.83  | 0.70  | -0.04 | 0.60  | 0.54  | 0.99  | 0.98  | 1.00  |      |      |      |      |       |      |      |  |  |  |
| 2-ME                          | -0.02            | -0.10 | -0.22 | -0.38           | -0.36                        | 0.52                          | 0.35                         | -0.37 | -0.09 | -0.02 | -0.30 | 0.03  | -0.24 | -0.04 | -0.04 | -0.20 | -0.20 | -0.21 | -0.08 | -0.27 | -0.02 | -0.06 | -0.08 | -0.27 | -0.32 | -0.31 | -0.33 | 1.00 |      |      |      |       |      |      |  |  |  |
| 2-MT                          | -0.04            | -0.12 | -0.23 | -0.40           | -0.38                        | 0.46                          | 0.29                         | -0.37 | -0.07 | -0.02 | -0.31 | 0.04  | -0.26 | -0.03 | -0.03 | -0.22 | -0.21 | -0.22 | -0.07 | -0.30 | -0.07 | -0.05 | -0.10 | -0.27 | -0.34 | -0.33 | -0.35 | 0.97 | 1.00 |      |      |       |      |      |  |  |  |
| Glu                           | -0.31            | -0.29 | -0.33 | -0.48           | -0.47                        | 0.06                          | -0.10                        | -0.49 | -0.34 | -0.30 | -0.44 | -0.27 | -0.44 | -0.35 | -0.35 | -0.37 | -0.36 | -0.43 | -0.24 | -0.45 | -0.24 | -0.21 | -0.35 | -0.32 | -0.41 | -0.41 | -0.41 | 0.46 | 0.46 | 1.00 |      |       |      |      |  |  |  |
| Fru                           | -0.14            | -0.23 | -0.29 | -0.50           | -0.43                        | 0.22                          | 0.03                         | -0.40 | -0.08 | -0.02 | -0.39 | 0.07  | -0.30 | -0.07 | -0.12 | -0.30 | -0.31 | -0.28 | -0.03 | -0.38 | -0.20 | 0.02  | -0.12 | -0.36 | -0.42 | -0.41 | -0.44 | 0.53 | 0.51 | 0.67 | 1.00 |       |      |      |  |  |  |
| Manni                         | -0.30            | -0.30 | -0.35 | -0.53           | -0.51                        | 0.15                          | 0.00                         | -0.50 | -0.29 | -0.23 | -0.49 | -0.23 | -0.48 | -0.30 | -0.29 | -0.39 | -0.38 | -0.45 | -0.19 | -0.49 | -0.27 | -0.18 | -0.33 | -0.35 | -0.47 | -0.46 | -0.48 | 0.58 | 0.58 | 0.88 | 0.69 | 1.00  |      |      |  |  |  |
| Ara                           | -0.34            | -0.34 | -0.39 | -0.54           | -0.52                        | 0.08                          | -0.05                        | -0.50 | -0.30 | -0.23 | -0.48 | -0.26 | -0.50 | -0.35 | -0.36 | -0.38 | -0.39 | -0.47 | -0.21 | -0.52 | -0.35 | -0.16 | -0.39 | -0.38 | -0.48 | -0.47 | -0.49 | 0.48 | 0.48 | 0.82 | 0.70 | 0.92  | 1.00 |      |  |  |  |
| Tre                           | -0.21            | -0.23 | -0.26 | -0.47           | -0.46                        | 0.19                          | 0.01                         | -0.46 | -0.25 | -0.21 | -0.41 | -0.16 | -0.37 | -0.22 | -0.21 | -0.34 | -0.33 | -0.37 | -0.15 | -0.40 | -0.20 | -0.13 | -0.24 | -0.30 | -0.41 | -0.41 | -0.42 | 0.57 | 0.55 | 0.81 | 0.68 | 0.88  | 0.80 | 1.00 |  |  |  |

Correlation coefficients were interpreted according (Schober et al. 2018). Correlation coefficient between 0.40 and 0.69 was considered as moderate correlation (yellow), 0.70 to 0.89 strong correlation (green) and 0.90 to 1 very strong correlation (blue). Gala –galactosan, Manno – mannosan, levo – levoglucosan, 2-ME – 2-methylerythritol, 2-methylthreitol, Glu – glucose, Fru – fructose, Manni – mannitol, Ara – arabitol, Tre – trehalose.

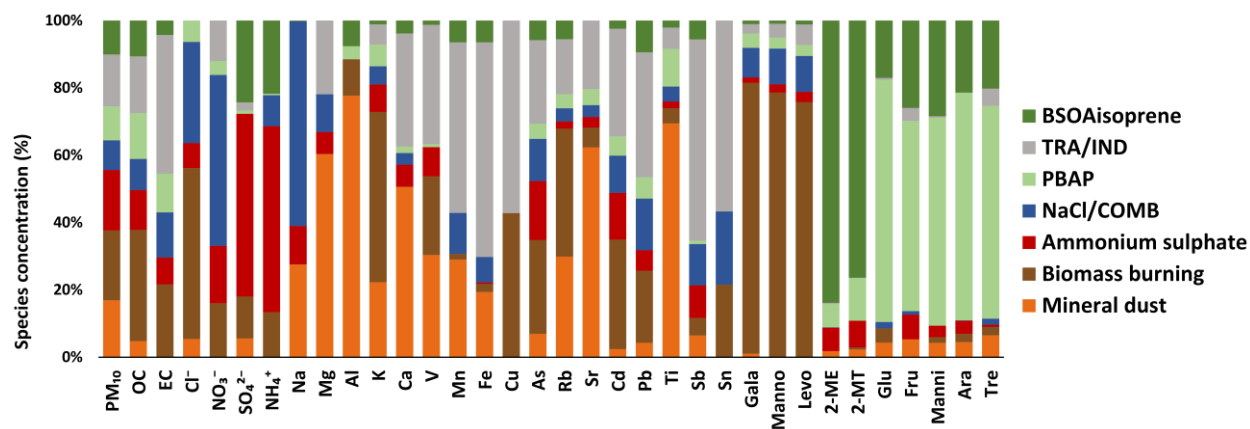

Figure S1. Fingerprints of identified factors in Belgrade; Biomass burning (BB); Long range transport and local combustion (NaCl/COMB); Mineral dust (MD); Primary biological aerosol (PBAP); Biogenic secondary organic (BSOA<sub>Isoprene</sub>); ammonium sulfate; Traffic/ Industry (TRA/IND); Gala –galactosan, Manno – mannosan, levo – levoglucosan, 2-ME – 2-methylerythritol, 2-methylthreitol, Glu – glucose, Fru – fructose, Manni – mannitol, Ara – arabitol, Tre – trehalose.

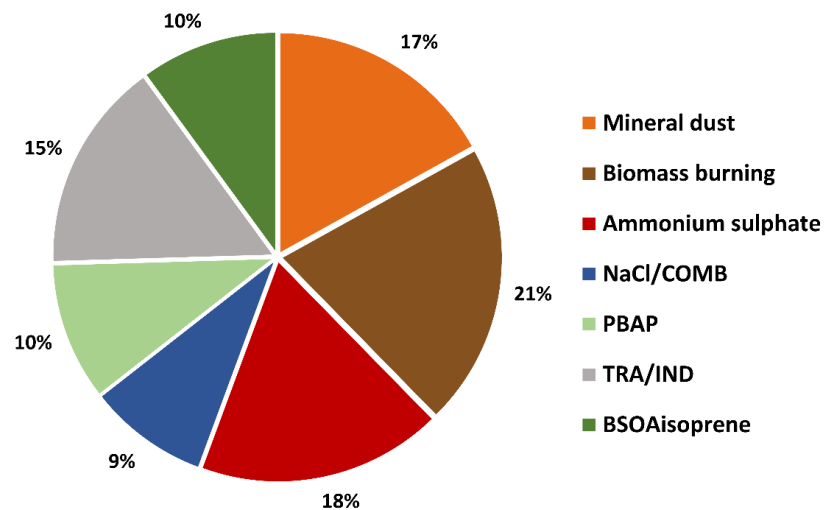

Figure S2. Factor contributions to total PM<sub>10</sub> mass concentration. Biomass burning (BB); Long range transport and local combustion (NaCl/COMB); Mineral dust (MD); Primary biological aerosol (PBAP); Biogenic secondary organic (BSOA<sub>Isoprene</sub>); ammonium sulfate; Traffic/ Industry (TRA/IND).

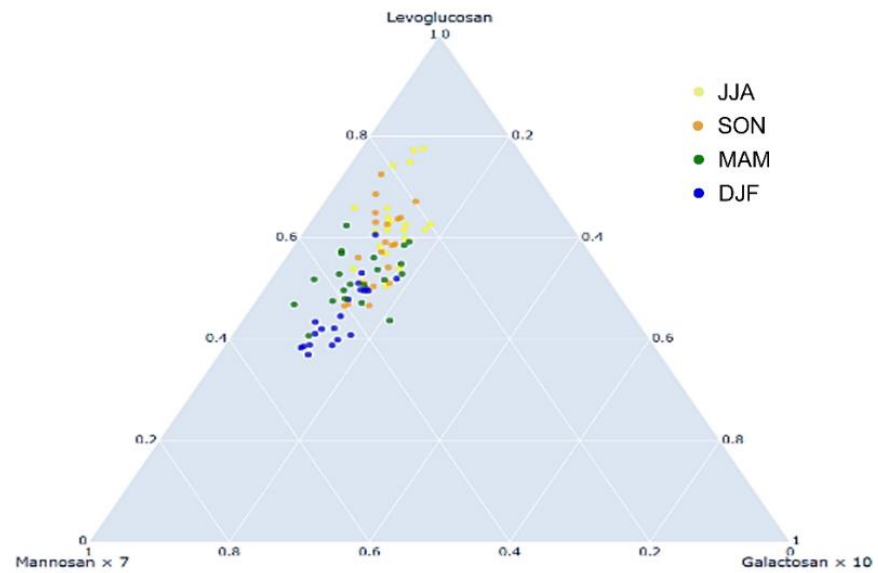

**Figure S3. Ternary plot of levoglucosan, mannosan and galactosan concentrations during different seasons. JJA – June, July, August; SON – September, October, November; MAM – march, April, May; DJF – December, January, February.**

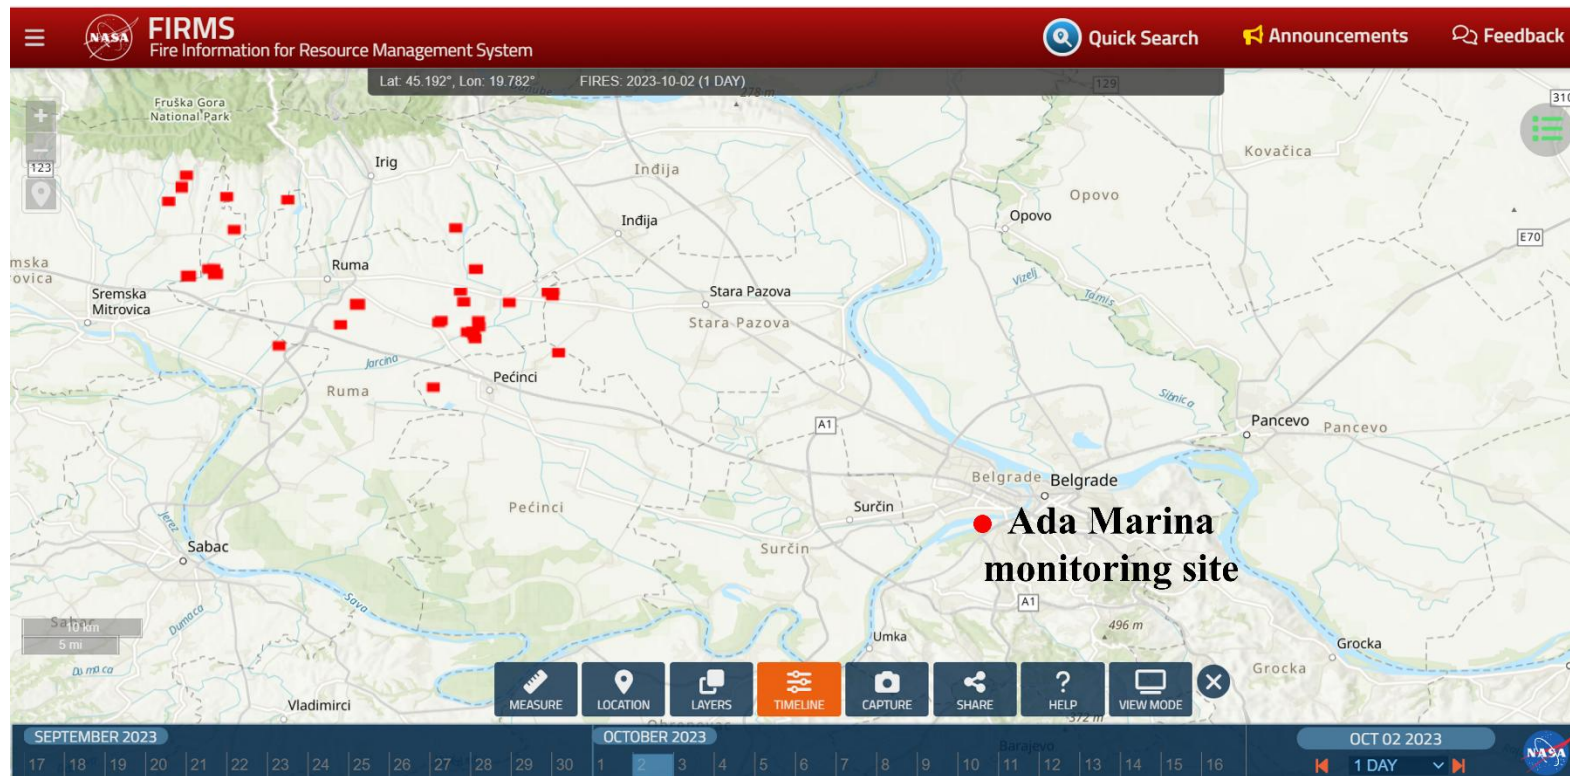

Figure S4. Open fire occurrence on day October 2<sup>nd</sup> (Source: [https://firms.modaps.eosdis.nasa.gov/map/#d:2023-10-02;l:fires\\_all,topo:@20.24,44.87,10.32z](https://firms.modaps.eosdis.nasa.gov/map/#d:2023-10-02;l:fires_all,topo:@20.24,44.87,10.32z)).

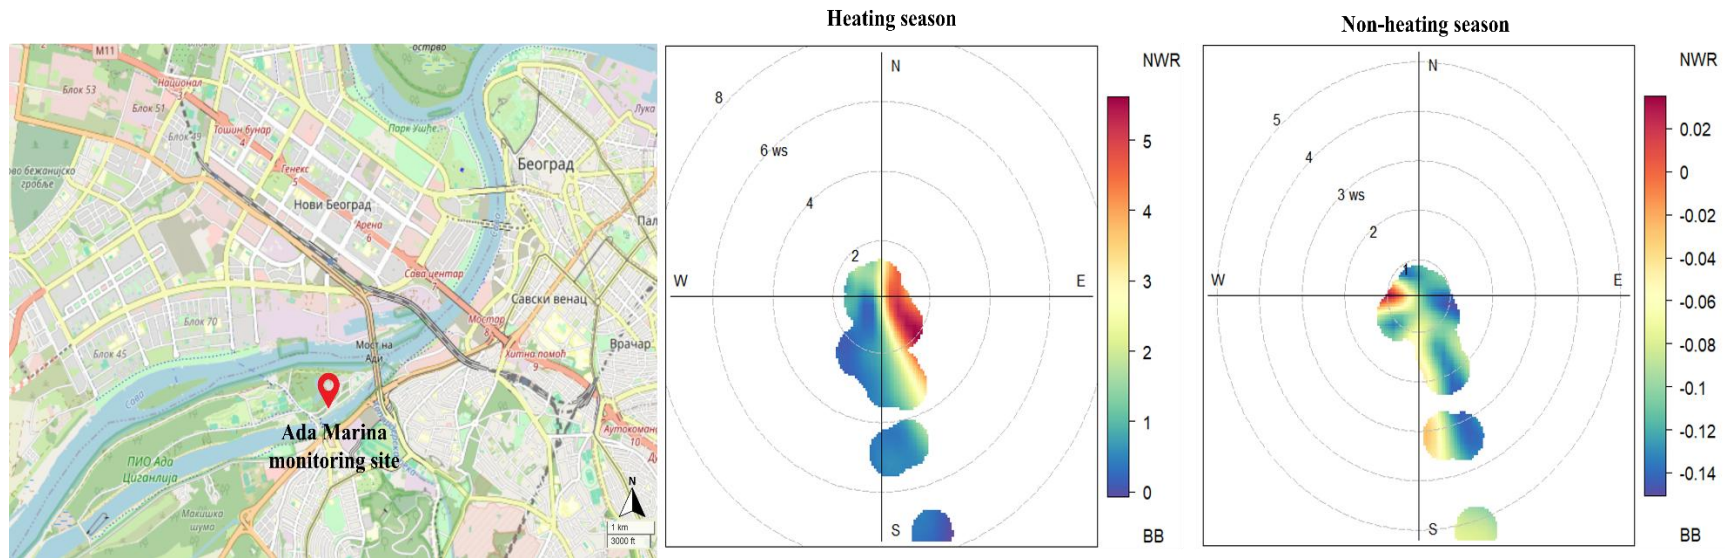

Figure S5. Location of the Ada Marina monitoring site and wind polar plots for heating and non-heating season (Source: © OpenStreetMap contributors).

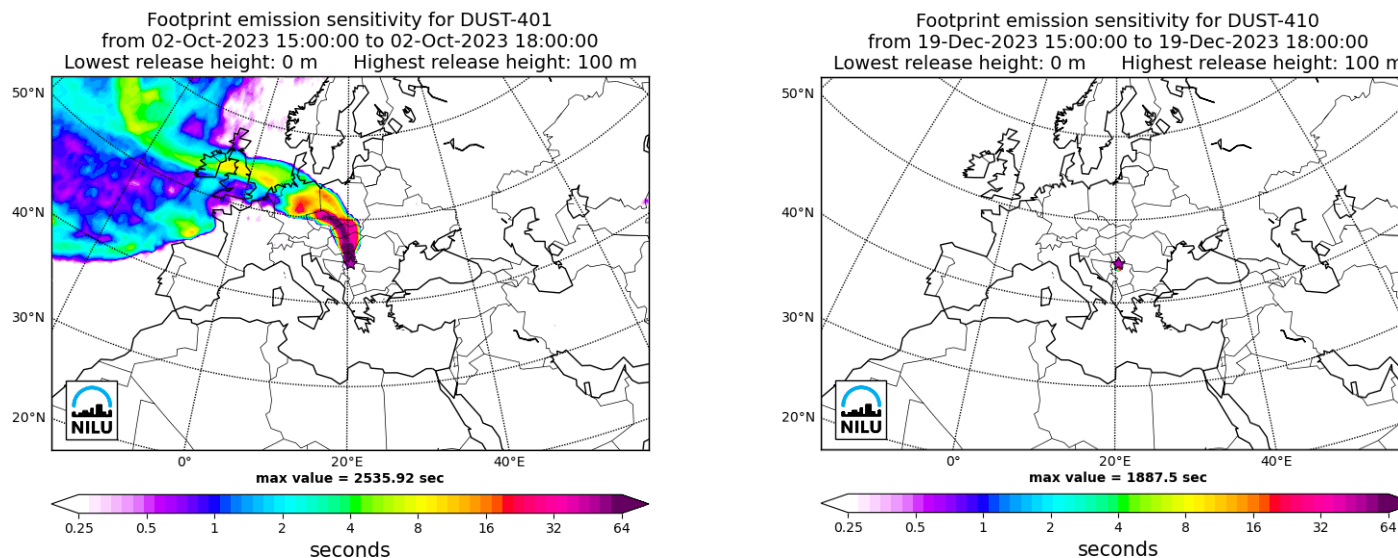

Figure S6. Mean surface footprint (residence time of an air mass over the surface before reaching the receptor) of the PMF factors for Ada Marina (to be added) and for the four peak days in the NaCl/COMB factor time series, obtained from FLEXPART model runs.

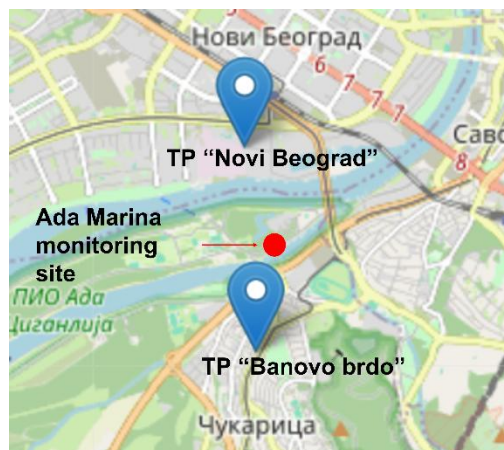

Figure S7. Locations of the thermal power plants closest to the Ada Marina monitoring station. TP – thermal power plant (Source: © OpenStreetMap contributors).

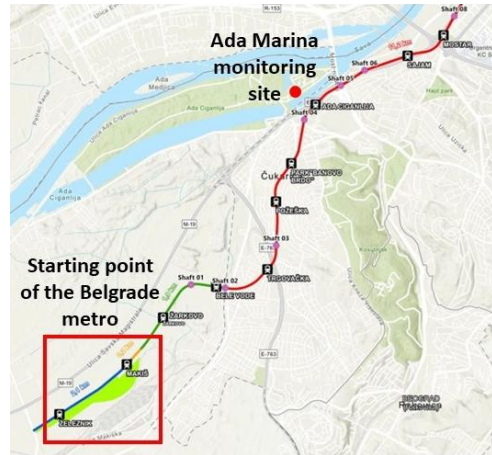

Figure S8. Location of the main depot of Belgrade metro that was being built during the sampling campaign (Makiš station); source: Belgrade metro and train (<https://bgmetro.rs/index.php/en/bg-metro/projects/line-1-phase-1>).

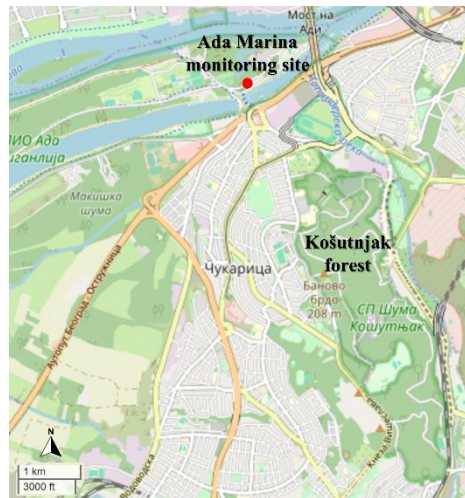

Figure S9. Location of the Košutnjak forest and Ada Marina monitoring site (Source: © OpenStreetMap contributors).

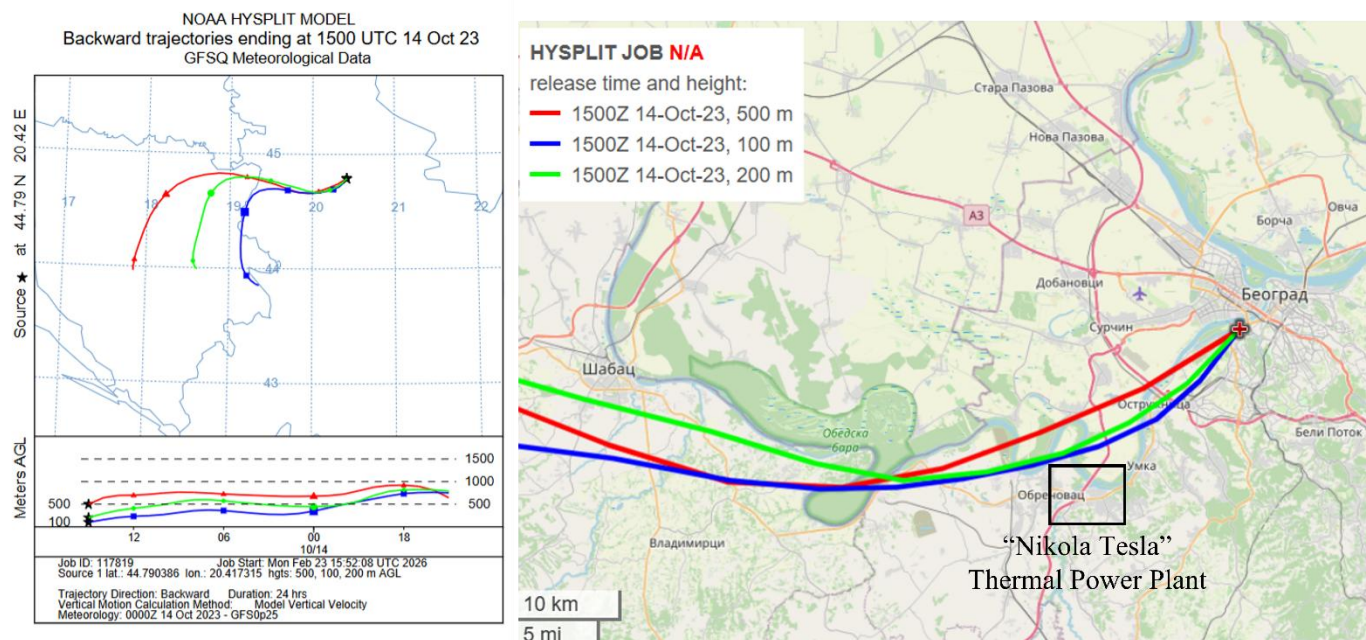

Figure S10. HYSPLIT model on 14<sup>th</sup> October 2023 and location of the monitoring site and “Nikola Tesla A” Power Plant (Source: © OpenStreetMap contributors).

## References

- Almeida, S., M., Manousakas, M., Diapouli, E., Kertesz, Z., Samek, L., Hristova, E., Šega, K., Padilla Alvarez, R., Belis, C. A., Eleftheriadis, K., The IAEA European Region Study Group: Ambient particulate matter source apportionment using receptor modelling in European and Central Asia urban areas. *Environ. Pollut.* 266, 115199, <https://doi.org/10.1016/j.envpol.2020.115199>, 2020.
- Cvetković, A., Jovašević-Stojanović, M., Marković, D., and Ristovski, Z.: Concentration and source identification of polycyclic aromatic hydrocarbons in the metropolitan area of Belgrade, Serbia. *Atmos. Environ.*, 112, 335-343, <https://doi.org/10.1016/j.atmosenv.2015.04.034>, 2015.
- Đorđević, D., Mihajlidi-Zelić, A., Relić, D., Ignjatović, L., Huremović, J., Stortini, A. M., and Gambaro, A.: Size-segregated mass concentration and water soluble inorganic ions in an urban aerosol of the Central Balkans (Belgrade). *Atmos. Environ.* 46, 309-317, <https://doi.org/10.1016/j.atmosenv.2011.09.057>, 2012.
- Glojek, K., Thuy, V. D. N., Weber, S., Uzu, G., Manousakas, M., Elazzouzi, R., Džepina, K., Darfeuil, S., Ginot, P., Jaffrezo, J. L., Žabkar, R., Turšič, J., Podkoritnik, A., and Močnik, G.: Annual variation of source contributions to PM10 and oxidative potential in a mountainous area with traffic, biomass burning, cement-plant and biogenic influences. *Environ. Int.*, 189, 108787, <https://doi.org/10.1016/j.envint.2024.108787>, 2024.

- Mijić, Z., Stojić, A., Perišić, M., Rajšić, S., and Tasić, M.: Receptor modeling studies for the characterization of PM10 pollution sources in Belgrade. *CI&CEQ*, 18, 623-634, <https://doi.org/10.2298/CICEQ120104108M>, 2012.
- Rajšić, S., Mijić, Z., Tasić, M., Radenković, M., and Joksić, J.: Evaluation of the levels and sources of trace elements in urban particulate matter. *Environ. Chem. Lett.*, 6, 95-100, <https://doi.org/10.1007/s10311-007-0115-0>, 2008.
- Todorović, M. N., Radenković, M. B., Onjia, A. E., and Ignjatović, L. M.: Characterization of PM2.5 sources in a Belgrade suburban area: a multi-scale receptor-oriented approach. *Environ. Sci. Pollut. Res.*, 27, 41717-41730, <https://doi.org/10.1007/s11356-020-10129-z>, 2020.
- Schober, P., Boer, C., & Schwarte, L. A.: Correlation coefficients: appropriate use and interpretation. *Anesth. Analg.*, 126, 1763-1768, <https://doi.org/10.1213/ANE.0000000000002864>, 2018.
